1 **At-home, cell-free synthetic biology education modules for**  
2 **transcriptional regulation and environmental water quality monitoring**

3 Kirsten J. Jung<sup>a,b,c,d,#</sup>, Blake J. Rasor<sup>a,b,c,#</sup>, Grant A. Rybnicky<sup>b,c,e,#</sup>, Adam D. Silverman<sup>a,b,c,d,#</sup>,  
4 Janet Standeven<sup>f</sup>, Robert Kuhn<sup>g,h</sup>, Teresa Granito<sup>i</sup>, Holly M. Ekas<sup>a,b,c</sup>, Brenda M. Wang<sup>a,b,c</sup>,  
5 Ashty S. Karim<sup>a,b,c</sup>, Julius B. Lucks<sup>a,b,c,d\*</sup>, Michael C. Jewett<sup>a,b,c,j,k,l\*</sup>

6

7 a. Department of Chemical and Biological Engineering, Northwestern University, Evanston, IL 60208,  
8 USA

9 b. Chemistry of Life Processes Institute, Northwestern University, Evanston, IL 60208, USA

10 c. Center for Synthetic Biology, Northwestern University, Evanston, IL 60208, USA

11 d. Center for Water Research, Northwestern University, Evanston, IL 60208, USA

12 e. Interdisciplinary Biological Sciences Graduate Program, Northwestern University, Evanston, IL,  
13 60208, USA

14 f. Lambert High School, Suwanee, GA 30024, USA

15 g. Centennial High School, Roswell, GA 30076, USA

16 h. Fulton County Schools Innovation Academy, Alpharetta, GA 30009, USA

17 i. Evanston Township High School, Evanston, IL 60201, USA

18 j. Robert H. Lurie Comprehensive Cancer Center, Northwestern University, Chicago, IL 60611, USA

19 k. Simpson Querrey Institute, Northwestern University, Chicago, IL 60611, USA

20 l. Department of Bioengineering, Stanford University, Stanford, CA 94305

21

22 # These authors contributed equally to this work.

23 \* Corresponding authors

24

25

26 **Correspondence**

27 Julius B. Lucks, [jblucks@northwestern.edu](mailto:jblucks@northwestern.edu)

28 Michael C. Jewett, [m-jewett@northwestern.edu](mailto:m-jewett@northwestern.edu)

29

30

31 **Abstract**

32           As the field of synthetic biology expands, the need to grow and train science,  
33 technology, engineering, and math (STEM) practitioners is essential. However, the lack of  
34 access to hands-on demonstrations has led to inequalities of opportunity and practice. In  
35 addition, there is a gap in providing content that enables students to make their own  
36 bioengineered systems. To address these challenges, we develop four shelf-stable cell-free  
37 biosensing educational modules that work by just-adding-water and DNA to freeze-dried crude  
38 extracts of *Escherichia coli*. We introduce activities and supporting curricula to teach the  
39 structure and function of the *lac* operon, dose-responsive behavior, considerations for biosensor  
40 outputs, and a ‘build-your-own’ activity for monitoring environmental contaminants in water. We  
41 piloted these modules with K-12 teachers and 130 high school students in their classrooms –  
42 and at home – without professional laboratory equipment or researcher oversight. This work  
43 promises to catalyze access to interactive synthetic biology education opportunities.

44

45

## 46 Introduction

47 Incorporating hands-on, active learning teaching methods at the secondary and  
48 undergraduate school levels increases student retention and performance across science,  
49 technology, engineering, and mathematics (STEM) disciplines [1-3]. In particular, biotechnology  
50 lab-based research, often done in high schools through inter-institutional joint studies such as  
51 the *Wolbachia* Project or SEA-PHAGES program [4, 5] contributes to significant improvement in  
52 students' self-reported technical and professional skills [6, 7].

53 Educational laboratory modules for synthetic biology, the fundamental science and  
54 engineering research that engineers biology to tackle global challenges (e.g., access to  
55 medicines, sustainable manufacturing), [8, 9] are in particular demand. Indeed, the acceleration  
56 of private and public investment in synthetic biology, [10-13] as well as the recent United States  
57 Presidential Executive Order on Advancing Biotechnology and Biomanufacturing [14] has  
58 heightened the need for supporting student literacy and learning. Such education is essential for  
59 long-term field participation, civic engagement, and ethical development [15].

60 Rapid growth of organizations like the International Genetically Engineered Machines  
61 (iGEM) [16, 17] competition, and the availability of do-it-yourself experiments from BioBuilder  
62 [18], Amino Labs (<https://amino.bio>), and the ODIN (<https://www.the-odin.com>) highlight this  
63 potential [19]. However, the high cost, slow pace, and regulatory bottlenecks and  
64 biocontainment requirements for experiments using engineered microbes preclude hands-on  
65 participation of many aspiring synthetic biologists [9], particularly students in under-resourced  
66 communities and schools.

67 Recently, cell-free gene expression (CFE) [20, 21] has emerged as a useful platform for  
68 widening access to synthetic biology education. In CFE systems, protein synthesis is carried out  
69 by transcription and translation machinery (polymerases, ribosomes, tRNAs, etc.) that has been  
70 harvested from living cells and reconstituted in a test tube [22]. The preparation of extract from  
71 *Escherichia coli* cells has been extensively optimized to allow for: high protein synthesis yields  
72 [23, 24]; on-demand synthesis of conjugate vaccines [25, 26], antibodies and antibody-drug  
73 conjugates [27-29], antibody fragments [30, 31], and antimicrobial peptides [32, 33]; detection of  
74 toxic metals and organic pesticides in drinking water [34-38] or nucleic acids in biological  
75 samples [39-43]; and rapid prototyping of genetic parts [44], enzyme pathways [45, 46], and  
76 post-translational modifications [47-49] using high-throughput liquid-handling robotics.

77 Cell-free expression systems are particularly suitable for decentralized distribution in  
78 low-resource settings, including classrooms, because the reactions are stable in a lyophilized  
79 format for months at room temperature [50]. Consequently, protein synthesis can be initiated

80 just by adding water and a template DNA [41]. Using freeze-dried CFE reactions, we and others  
81 have developed experimental learning modules for high school and undergraduate students,  
82 focused on teaching the central dogma [51-53], antibiotic resistance [54], and the mechanism of  
83 CRISPR-Cas9 [54, 55]. The simplest of these modules has been commercialized as the  
84 BioBits<sup>®</sup> Central Dogma kit [56].

85 Early successes with cell-free education kits nevertheless left several gaps to be  
86 addressed. First, because students performed most of the published experiments in well-  
87 equipped university labs rather than a high school classroom, widespread access was not  
88 guaranteed [51, 54, 55]. The importance of minimal-equipment experiments was made even  
89 more apparent by the COVID-19 pandemic, during which many students were unable to attend  
90 a classroom. Second, previous work demonstrating student success in the experimental  
91 modules was limited to small sets of students and failure modes were not outlined, either for  
92 experimental scaleup or for individual student performance. Finally, the proposed experiments  
93 did not allow students the creative freedom to design, build, and test their own engineered  
94 systems. In a world where the half-life of cutting-edge technology is decreasing, students need  
95 learner-led opportunities that afford them the ability to evaluate new material and test potential  
96 answers (or at least organize the possibilities) to unsolved problems.

97 Here, we set out to develop freeze-dried, cell-free educational modules that could  
98 address these gaps to facilitate both inquiry-based learning and at home usage for expanded  
99 access and impact. As a model, we focused on biosensing. Three experimental modules  
100 allowed students to interrogate the mechanism of the regulation of the lactose-inducible operon  
101 from *E. coli*, measure the dose-response of the LacI repressor protein to isopropyl  $\beta$ -d-1-  
102 thiogalactopyranoside (IPTG; lactose analog), and compare the performance of four reporter  
103 outputs. To facilitate inquiry-guided learning, we also developed a fourth “design-your-own-  
104 biosensor” module, leveraging cascaded genetic circuitry to design, build, and test cell-free  
105 biosensors for the detection of toxic contaminants in drinking water. Finally, we investigated the  
106 distribution of cell-free education modules at scale. We prepared kits for remote use by 130  
107 advanced high school biology students (including several who performed the experiments in  
108 their own homes). Overall, the student experimental success rate varied between 60 and 100%,  
109 depending on the module and scale. We measured significant improvement in student  
110 understanding and engagement after completing the modules, and also identified stumbling-  
111 blocks for further scaling out this technology to more schools, teachers, and scientists-in-  
112 training.

113

## 114 Results and Discussion

115

### 116 Preliminary design of a biosensing education kit

117 We set out to create cell-free biosensing education modules that could enable students  
118 to build their own cell-free biosensors and be carried out in a distributed, at home setting. To  
119 start, we designed three simple experiments to explore the design of a cell-free biosensor. We  
120 chose the *E. coli* lac operon as a model since it is widely taught as an example of a negative-  
121 inducible system [57]. The allosteric transcriptional factor LacI represses transcription initiation  
122 at a lactose-inducible promoter (pLac) containing the operator sequence (*lacO*) (**Figure 1A**) [58,  
123 59]. We built a lactose-inducible reporter plasmid in which the coding sequence for monomeric  
124 red fluorescent protein (mRFP) is placed downstream of the *lacUV5* promoter. Then, as  
125 previously described [34], we pre-enriched an *E. coli* cell extract with LacI by overexpressing the  
126 transcription factor during growth (**Figure 1A**).

127 For the Module 1 experiment (mechanism), we prepared three reaction conditions, each  
128 comprising 20  $\mu$ L cell-free sensors with all requisite CFE reagents, freeze-dried with the extract  
129 and reporter plasmid. The first pair of 20  $\mu$ L reactions included 40 nM of the pLac-mRFP  
130 plasmid, but no pre-enriched LacI beyond the genomic copy in our BL21 Star (DE3) *E. coli*  
131 chassis strain. In the second pair of reactions, 5% of the reaction's unenriched extract was  
132 replaced with an extract pre-enriched with LacI, a fraction that we found was optimal for  
133 repression (**Supplemental Figure S1**). However, transcription from the provided reporter  
134 plasmid (J23119-mRFP) is constitutive because this promoter lacks an operator site. The third  
135 pair of reactions constituted the intact sensor, with both LacI present in the extract and a pLac-  
136 mRFP reporter plasmid. We also included positive and negative mRFP calibration controls  
137 consisting of lyophilized purified protein at a concentration of 0 or 15  $\mu$ M. Thus, the full module  
138 constituted an eight-strip of PCR strip tubes (**Figure 1B**). When rehydrated with either 0 or 100  
139  $\mu$ M IPTG inducer, only the third pair of tubes showed both repression and induction: without  
140 either the repressor or operator, the sensor was broken and constitutively ON. Conveniently, at  
141 a 24-hour endpoint, sufficient mRFP was synthesized in the ON conditions to be visible to the  
142 naked eye or under a blue light imager [51].

143 Following these experimental controls, Module 2 (dose response) was then designed  
144 with the aim of teaching students about the concentration dependence of biosensors (simplified,  
145 to omit the effects of catabolite repression and cooperativity [60]). Six tubes containing the  
146 inducible lactose sensor (containing 5% LacI extract and the pLac-mRFP plasmid) were freeze-  
147 dried along with the same calibration controls, and the reactions were rehydrated with

148 increasing concentration of IPTG. As expected, a smooth increase in red fluorescence was  
 149 observed, up to saturation at 100  $\mu\text{M}$  (Figure 1C).  
 150

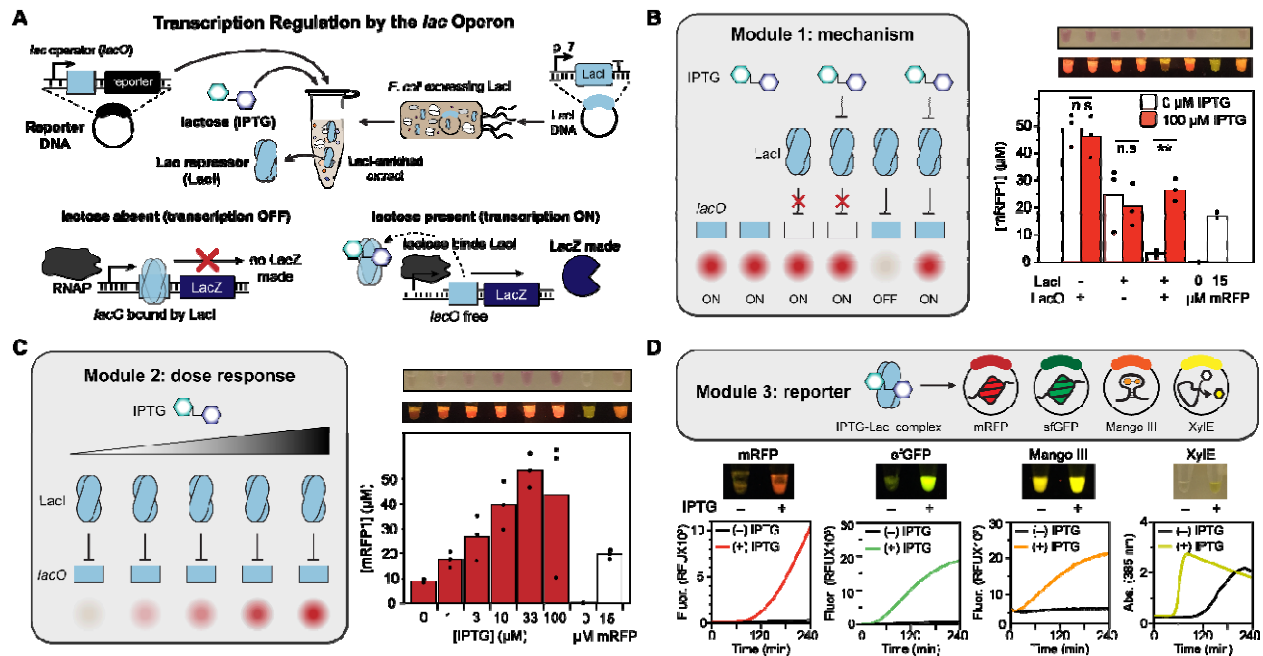

151  
 152 **Figure 1. Design of a synthetic biology education module for transcription regulation by**  
 153 **the *lac* operon.** (A) Overview of cell-free lactose sensor. The Lac repressor (LacI) is over-  
 154 expressed in *E. coli* used to prepare source extract and represses its target promoter,  
 155 containing a copy of the *lac* operator sequence upstream of the reporter protein or RNA gene.  
 156 (B) Laboratory data for a module designed to teach the mechanism for the Lac repressor using  
 157 an eight-strip of PCR tubes. Tubes 1 and 2 contain lyophilized CFE reactions without LacI (*i.e.*,  
 158 only blank extract) and 40 nM of the reporter plasmid pLac-mRFP1. Tubes 3 and 4 contain  
 159 lyophilized reactions with LacI, but the reporter plasmid lacks a *lac* operator (J23119-mRFP1).  
 160 Tubes 5 and 6 contain the full sensor (LacI-enriched extract and pLac-mRFP). Tubes 7 and 8  
 161 are controls containing, respectively, 0 and 15  $\mu\text{M}$  of purified mRFP1. Upon rehydration with 20  
 162  $\mu\text{L}$  either water (tubes 1, 3, 5, 7, and 8) or 100  $\mu\text{M}$  IPTG (tubes 2, 4, and 6), repression is only  
 163 observed in tube 5, where the repressor and operator are present and no IPTG is supplied.  
 164 Plotted data represent the average and individual endpoint yields of mRFP1, computed from a  
 165 fluorescence calibration curve generated by purified mRFP1, from three independent technical  
 166 replicates for the full eight-strip module, rehydrated in a research laboratory and incubated at 30  
 167  $^{\circ}\text{C}$  for 24 hours. Sample images of one replicate are shown in white and blue light (using the  
 168 miniPCR bio<sup>TM</sup> P51<sup>TM</sup> Molecular Fluorescence Viewer) from an iPhone photograph. \*\*  
 169 represents  $p < 0.05$ ; n.s. indicates no significant difference between the + and - IPTG  
 170 conditions. (C) Laboratory data for a module designed to teach the dose response behavior of  
 171 the LacI sensor. Freeze-dried reactions containing LacI and 40 nM pLac-mRFP1 were  
 172 rehydrated with the indicated concentration of IPTG, and incubated at 30  $^{\circ}\text{C}$  overnight, then  
 173 quantified by plate reader. The 0 and 15  $\mu\text{M}$  mRFP controls were maintained in this module. (D)  
 174 Laboratory data for a module designed to teach the advantages and disadvantages of  
 175 alternative reporter outputs for the LacI sensor. Freeze-dried reactions were prepared with LacI-  
 176 enriched extract, half containing 0  $\mu\text{M}$  IPTG (tubes 1, 3, 5, and 7), and half containing 100  $\mu\text{M}$   
 177 IPTG (tubes 2, 4, 6, and 8). The lyophilized reactions were rehydrated with 20  $\mu\text{L}$  of 40 nM

178 pLac-mRFP1 plasmid (tubes 1 and 2), 20 nM pLac-sfGFP plasmid (tubes 3 and 4), 80 nM pLac-  
179 Mango III plasmid + 2  $\mu$ M T01:biotin (RNA aptamer, tubes 5 and 6), or 10 nM pLac-XylE  
180 plasmid + 2 mM catechol and pipetted onto a plate reader to measure the kinetics of sensor  
181 activation over four hours at 30 °C. Colored lines represent the average of three (+) IPTG  
182 conditions; black lines indicate (-) IPTG. Photos indicate reaction yield at the endpoint in blue  
183 light (fluorescent outputs) or white light (XylE).

184  
185  
186 Finally, in Module 3 (reporter), we explored the choice of output for a putative point-of-  
187 use biosensor. In addition to mRFP, we cloned superfolder green fluorescent protein (sfGFP)  
188 [61], the RNA aptamer Mango III [62, 63], and the colorimetric enzyme XylE (catechol 2,3-  
189 dioxygenase [35]), under transcriptional regulation by the pLac promoter. After optimizing the  
190 concentration for each reporter DNA (**Supplemental Figure S2**), we induced activation of each  
191 reporter in the presence of IPTG, though with different degrees of sensor leak/background  
192 signal and time to result. Predictably, the RNA aptamer was the quickest reporter to be  
193 produced, but it was invisible to the naked eye, and its background fluorescence from the  
194 T01:biotin dye was high under blue light. Also as expected, sfGFP folded faster than mRFP and  
195 generated a signal at an earlier time point; both fluorescent proteins could be observed at the  
196 endpoint under white and blue light. XylE activated quickly (measured by the development of  
197 yellow color under white light), but it also had the greatest amount of leak due to the enzymatic  
198 turnover and unavoidable transcriptional leak through LacI, as previously described (**Figure 1D**)  
199 [64].

## 200 201 **Small-scale implementation of three biosensing education modules in high school** 202 **classrooms**

203 Next, we adapted Modules 1-3 for a classroom setting. We developed a roughly one-  
204 week-long curriculum that guided students through the three experiments and developed  
205 curricula intended for an advanced secondary school (AP Biology) classroom (all curricula  
206 included in **Supplemental File 6**). We then prepared 25 freeze-dried reaction strips for each  
207 module, identical to the experiments performed by trained researchers in **Figure 1**. These  
208 experimental modules were then performed by 22 AP Biology students in their own classrooms  
209 at Evanston Township High School over the course of a week. To simplify the experiment and  
210 remove some sources of external error, all students had been previously exposed to  
211 micropipettes and cell-free gene expression through the BioBits<sup>®</sup> Central Dogma kit.

212 For Modules 1 and 2, the rehydrated reactions were incubated at room temperature for  
213 48 hours in the classroom and then transported back to our laboratory for image analysis and  
214 quantification by plate reader. For Module 3, which was time sensitive, we instead captured

215 images of the rehydrated tubes in white and blue light initially, after 1 hour, and after 24 hours,  
 216 on-site in the classroom. The resulting experimental data and representative photographs are  
 217 plotted in **Figure 2**. The full data set from students, including uncropped photographs, are  
 218 available in **Supplemental Files 1-3**.  
 219

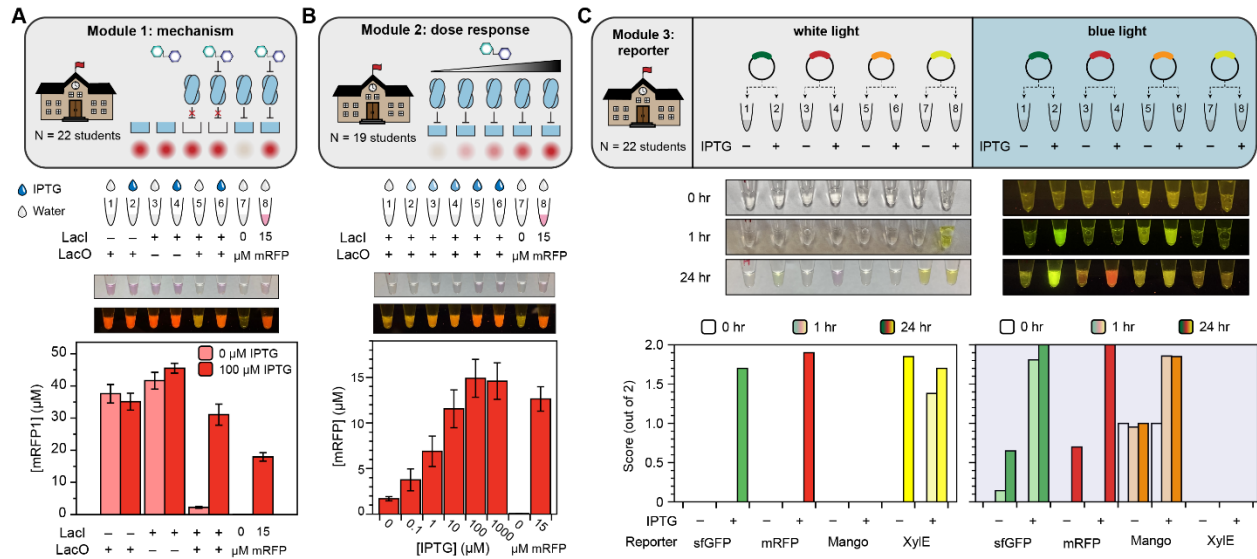

220  
 221 **Figure 2. Results of small-scale deployment of biosensing educational kit in advanced**  
 222 **high school classroom.** (A) Implementation of Module 1 (mechanism) experiment in high  
 223 school classroom. Students added either water or 100  $\mu\text{M}$  IPTG to the indicated tubes using a  
 224 micropipette, and the reactions were incubated for 48 hours at room temperature. Then, the  
 225 reactions were collected, and yields were quantified by plate reader. Bars represent the  
 226 average, and error bars represent the standard error of the mean, from 22 replicates. Inset  
 227 photos represent white and blue light photos (in P1 imager) of a sample replicate. (Full student  
 228 data for all modules are available in the **Supplemental Files**) (B) Implementation of Module 2  
 229 (dose response) experiment in high school classroom. Reactions were incubated for 48 hours at  
 230 room temperature and quantified by plate reader. Data represent the average and standard  
 231 error of the mean from 19 student replicates, with one representative sample photo taken at  
 232 endpoint in white and blue light. (C) Implementation of Module 3 (reporters) experiment in high  
 233 school classroom. Students added reporter plasmids as indicated; then, reactions were  
 234 incubated at 30  $^{\circ}\text{C}$  and photographs were taken in white and blue light at  $t = 0$  hours,  
 235 1 hour, and 24 hours for each reaction set. Researchers then qualitatively assigned to each photograph  
 236 values 0, 1, or 2 to represent “OFF”, “FAINT”, or “ON”, respectively. The indicated bars  
 237 represent the average score from 21 student replicates of the reporter activity at each time point  
 238 (indicated by bar shading), for each reporter (indicated by bar color), and in white and blue light  
 239 (left and right plots, respectively). One sample time-course with paired photos is shown.

240  
 241  
 242 The students’ data generated in the classroom matched the laboratory data very well.  
 243 Dispensing either water or IPTG solution from micropipettes, the students generally achieved  
 244 the expected qualitative results in Modules 1 and 3; somewhat greater variability was observed  
 245 Module 2, possibly due to errors in serial dilution (the students performed their own dilutions



246 from a 100  $\mu$ M IPTG stock). Of the 22 students who performed Module 1, 16 had a “perfect”  
247 response of ON, ON, ON, ON, OFF, ON, OFF, ON for tubes 1-8, and over 90% of the individual  
248 tubes matched the expected behavior. The experiment only failed for one student. Thirteen of  
249 the nineteen students who performed Module 2 also observed the expected smooth, monotonic  
250 increase in mRFP production between tubes 1-6 as IPTG dose increased.

251 To quantify success rates in Module 3, since we could not take plate reader  
252 measurements at intermediate timepoints in the classroom, we instead assigned qualitative  
253 brightness scores of 0, 1, or 2 to each reporter, with and without the inducer, at each timepoint,  
254 based on the students’ photographs in white and blue light. After one hour, most students  
255 observed the sfGFP and Mango reporters to be ON in blue light, and the XylE reporter was ON  
256 in white light. Increases in both signal and leak were observed for all reporters after 24 hours. In  
257 many cases, the XylE signal was stronger in the OFF state than the ON state after 24 hours  
258 because the product of the chemical reaction degrades.

259

### 260 **Evaluation of educational impact of biosensing kits at secondary school level**

261 To assess whether the biosensing kits were effective in inspiring and teaching the  
262 students who did the activities in the small-scale implementation, we measured how well the  
263 program goals were met through pre- and post- module surveys (**Figure 3A**). The survey  
264 consisted of a series of statements and asked the student to rate whether they agree with the  
265 statement or not on a scale from 1-5, with a score of 1 indicating that they strongly disagree with  
266 the statement, a score of 3 indicating that they neither agree nor disagree, and a score of 5  
267 indicating that they strongly agree with the statement. Prior to completing any of the three  
268 experimental activities, students were asked to fill out a survey to establish baseline biology  
269 knowledge and perceptions. Following each of the experimental activities, but before seeing any  
270 material for the next activity, students were asked to take the same survey again to capture  
271 changes as a result of participating in that module.

272

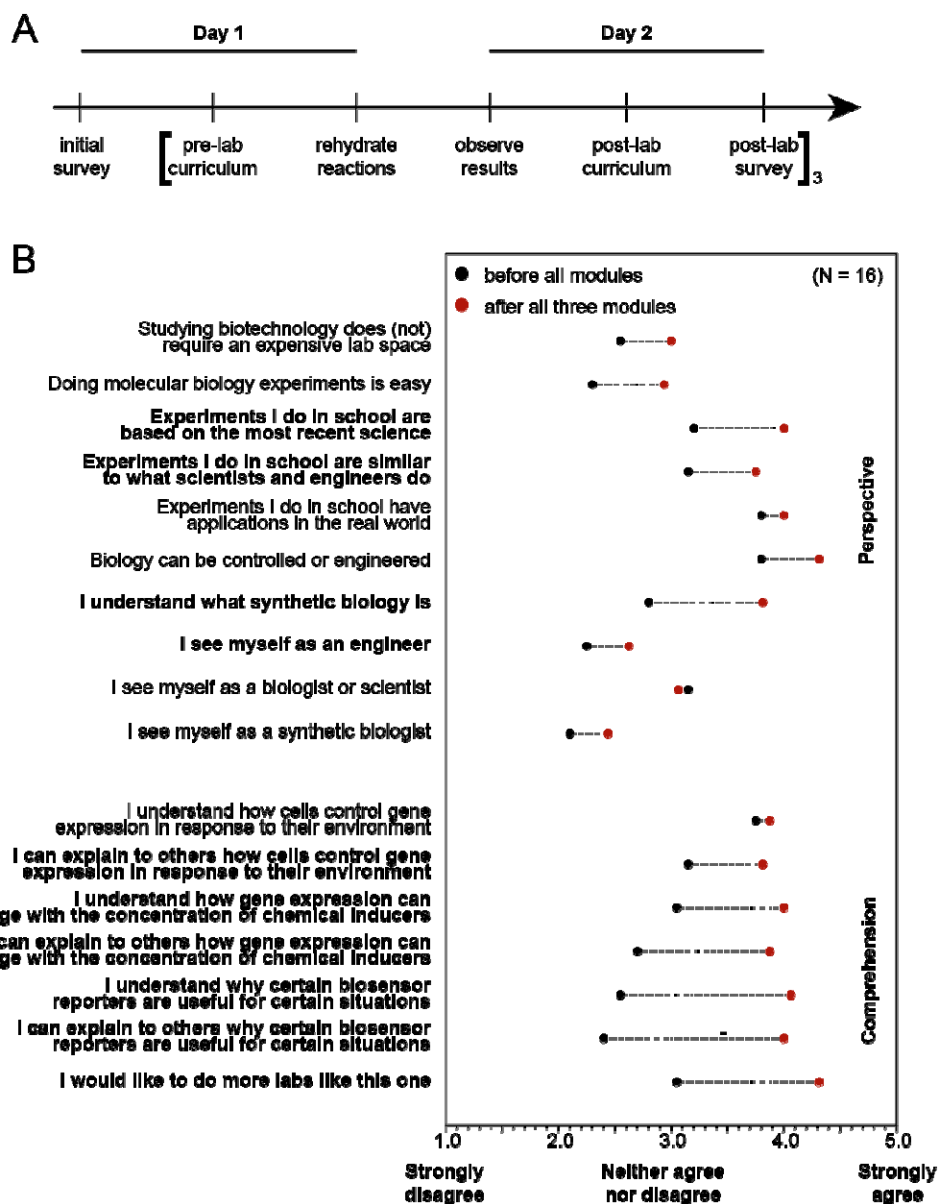

273  
 274 **Figure 3. Experiential impact on students' learning from biosensing modules.** (A) Sample  
 275 timeline for performing Modules 1 through 3 in a week of experimental instructional learning,  
 276 including pre- and post-lab surveys. (B) Survey results from 16 students who performed all  
 277 three experimental modules. Black dots indicate the average scores (between 1 and 5) to the  
 278 "comprehension" and "perspective" questions before performing the experiments, and red dots  
 279 indicate scores afterwards. Bolded questions showed a significant ( $p < 0.05$ ) increase in score  
 280 across paired student replicates from a Wilcoxon signed-rank paired test. Questions match  
 281 exactly what was present in the student surveys, with the exception of the first statement which  
 282 was written in the negative form, "Studying biotechnology requires an expensive lab space", and  
 283 has been negated here for clarity.

284  
 285 Overall, survey questions were designed to assess two outcomes of the experimental  
 286 activities: (1) changes in perspective of science and engineering and (2) changes in

287 comprehension of biological and engineering concepts. Generally, participation in the three-  
288 activity series increased survey scores across both categories (**Figure 3B**). Participation in the  
289 activities significantly increased how likely students were to agree with the perspective  
290 statements that: the experiments that they do in school “are based on the most recent science”  
291 and are “similar to what scientists and engineers do”, as well as that they “understand what  
292 synthetic biology is”, that they “see themselves as engineers”, and that they “would like to do  
293 more experiments like this one.” Likewise, participation in the activities significantly increased  
294 how likely students were to agree with the comprehension statements that they understood and  
295 could explain the material.

296

### 297 **Development of an advanced module for biosensor design**

298 We developed the initial three experimental modules to teach regulation by the *lac*  
299 operon because it is a well-understood biosensor in *E. coli*. However, towards the goal of  
300 engaging students in synthetic biology, and the known learning benefits of having students  
301 solve problems, answer questions, and formulate questions of their own [1, 65, 66], we next  
302 created an avenue for students to design, build, and test their own cell-free biosensors. As a  
303 model, we developed a biosensor activity to detect water contaminants of public health concern.

304 Previous efforts to engage students in the synthetic biology design-build-test-learn  
305 framework have struggled with the build phase due to challenges in DNA assembly and  
306 transformation (roadblocks that hold back many iGEM teams as well [67]). Cell-free expression  
307 circumvents some of these challenges: PCR-amplified linear DNA can be used in lieu of cloned  
308 plasmids, and transformation is unnecessary. However, as a different approach, we decided to  
309 use a cascaded amplifier circuit [68] to decouple the genetic linkage between the sensing  
310 elements (allosteric transcription factor (aTF) and inducible promoter) and the reporter protein.  
311 Briefly, the cascaded amplifier uses an orthogonal T7 RNA polymerase (o-T7 RNAP) as the  
312 output of the inducible promoter, and a second plasmid encodes the reporter protein under the  
313 control of the corresponding T7 promoter ( $P_{o-T7}$ ) (**Figure 4A**). The advantage of this setup is that  
314 we could lyophilize all sensor elements together (the aTF-enriched extract and its corresponding  
315 inducible sensor plasmid, pReg-o-T7 RNAP) to make an arbitrary ligand-sensing reaction, but  
316 without a defined transcriptional reporter. Then, to simultaneously build and test the sensor,  
317 students could rehydrate the reactions with liquid stocks containing the desired reporter plasmid  
318 and any co-substrates: essentially, running any or all of the Module 1-3 experiments as desired  
319 for environmentally relevant contaminants, with a single set of reporter plasmids.

320 We developed cascaded cell-free sensors for fluoride (using the *crcB* riboswitch [35]),  
321 copper (using the CueR aTF [69]), and lead (using the PbrR aTF [70]) (**Figure S4**). We also  
322 made negative and positive controls (in which o-T7 RNAP production is constitutively OFF or  
323 ON). When the lyophilized sensors were rehydrated with the respective orthogonal-promoter  
324 reporter plasmids ( $P_{o-T7}$  regulating expression of mRFP, sfGFP, Mango, or XylE), correct ligand-  
325 dependent induction was observed across all 80 possible combinations of five sensor plasmids,  
326 four reporter plasmids, and four inducers.

327 Armed with these designs, we asked nine groups of high school students who had  
328 already performed the LacI experiments to design and test their own biosensors. We specifically  
329 requested that they formulate hypotheses and devise positive and negative controls while  
330 allowing them to manipulate variables not tested in Modules 1-3. We provided each group the  
331 necessary reagents based on their experimental designs (e.g., reporter plasmids and inducers,  
332 freeze-dried sensor reactions containing the requested enriched aTFs/sensor plasmids) and  
333 simply requested photographs of the sensors at regular intervals after hydration to evaluate  
334 performance. The list of all the student-designed experiments is below in **Table 1**, and  
335 annotated pictures of sample experiments are in **Figure 4B**. The full student lab reports,  
336 including backgrounds and raw, uncropped photos are provided in the **Supplemental File 4**.

337

338 **Table 1. A summary of student-led designs for Module 4 experiments.**

| Group | Experiment                                                                                                                       |
|-------|----------------------------------------------------------------------------------------------------------------------------------|
| 1     | Detecting lead in vegetable and fruit samples                                                                                    |
| 2     | Measuring the limit of detection and leakiness of the lead sensor as a function of reporter output                               |
| 3     | Measuring the kinetics of the lead sensor with enzymatic reporter as a function of incubation temperature and lead concentration |
| 4     | Measuring the kinetics and signal of the fluoride sensor as a function of reporter output                                        |
| 5     | Comparing the leak, dose response, and stability of response of the copper sensor with aptamer and enzymatic reporters           |
| 6     | Measuring the dose-response of fluoride sensor with enzymatic reporter output                                                    |
| 7     | Detecting copper in environmental water samples                                                                                  |
| 8     | Measuring the specificity and kinetics of the lead sensor with the aptamer output at 26 and 37 °C                                |
| 9     | Measuring the limit of detection of the lead sensor with the enzymatic reporter                                                  |

339

340 Student success in Module 4 was varied, and many groups reported explicit sources of  
341 experimental error in their lab reports (e.g., contamination, loss of the lyophilized reaction  
342 pellet). However, this study provides a powerful proof-of-principle for the versatility of cascaded

343 cell-free sensors, which allow students to detect any target molecule with any reporter output,  
 344 while testing multiple induction conditions, temperatures, reporter plasmid concentrations, or  
 345 sources of water samples. For instance, the reporter plasmid library could easily be extended to  
 346 encompass fluorescent protein libraries [51] or enzymes that produce tactile or olfactory outputs  
 347 [52]. These would be compatible with any sensed input, without needing to separately clone  
 348 each inducible promoter.  
 349

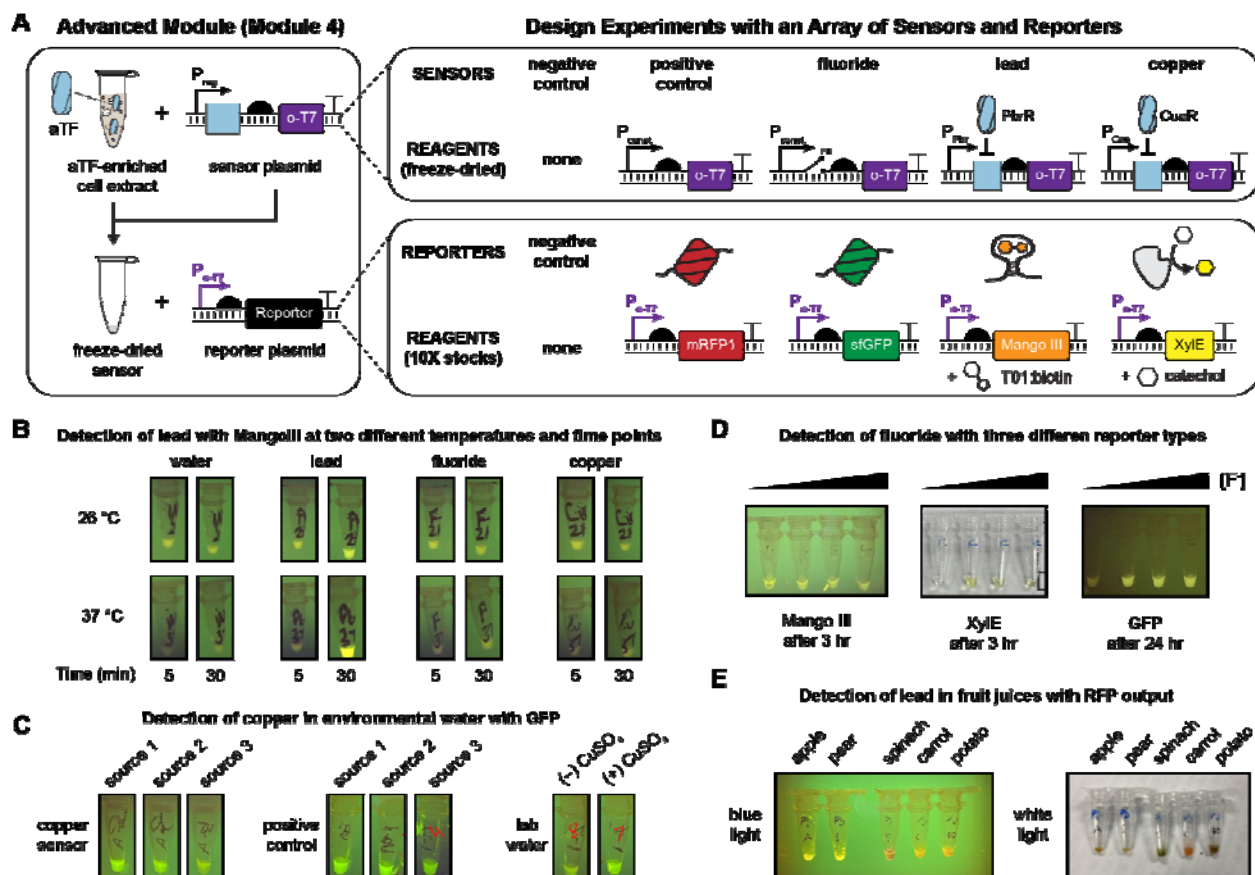

350  
 351 **Figure 4. Advanced experimental module for student-initiated biosensor design.** (A)  
 352 Overview of Module 4 (advanced design). Students were provided freeze-dried sensor reactions  
 353 containing cell-free extracts pre-enriched with the allosteric transcription factors PbrR (lead  
 354 sensor) or CueR (copper sensor) as well as the respective sensor plasmids, in which a  
 355 regulated, paired promoter (pPbr, pCue), riboswitch (fluoride sensor), or constitutive promoter  
 356 (positive control) drives expression of orthogonal T7 RNAP in an RNA polymerase cascade. (A  
 357 negative control sensor reaction lacked a sensor plasmid to synthesize o-T7 RNAP.) They were  
 358 also provided, in 10X concentrates, plasmids encoding the Module 3 reporters and substrates  
 359 mRFP1, sfGFP, Mango III + T01:biotin, and XylE + catechol, with the reporters placed under  
 360 control of the o-T7 promoter. Finally, they were given liquid stocks for copper, lead, and fluoride.  
 361 By rehydrating the sensor reaction with a reporter plasmid and analyte of choice, students could  
 362 therefore build, test, and design arbitrary sensor-output pairs for common inorganic water  
 363 contaminants—all without any cloning. (B-E) Sample results from four experiments designed  
 364 and implemented by student groups. All reactions were designed by high school students, with

365 one round of intermediate feedback; the materials were prepared for nine student groups (30  
366 students altogether) and reactions were implemented. Full details of each experiment, including  
367 students' submitted reporters and all provided photos, are provided in supplemental materials.  
368 (B) Students constructed a cell-free lead sensor with a Mango III aptamer output and tested its  
369 activation against four input water sources, at two different times and two different  
370 temperatures. (C) Students constructed a cell-free copper sensor with a sfGFP output and  
371 tested it against three environmental water samples. (D) Students constructed cell-free fluoride  
372 sensors with three reporter outputs and tested the dose-response behavior for Mango, GFP,  
373 and XylE outputs. (E) Students constructed a cell-free lead sensor with RFP output and used it  
374 to measure lead in fruit juices.

375

### 376 **Large-scale implementation of biosensing education kits**

377 To the best of our knowledge, all previous cell-free educational studies reported the  
378 results from hands-on experiments in professionally equipped laboratories. Our experiments in  
379 **Figures 2** and **3** were performed in high school classrooms, but these were still equipped with  
380 scientific instruments such as micropipettes. When many American high schools shut down in  
381 2020 due to the COVID-19 pandemic and biology classrooms switched overnight to remote  
382 learning, we wondered if the intrinsic safety (i.e., no living cells) and thermal stability of freeze-  
383 dried cell-free sensors would allow them to be used for at-home experiential learning.

384 To test this possibility, we assembled the largest-scale distributed cell-free expression  
385 experiment to our knowledge. This consisted of 120 packaged Module 1 strip-tubes (720 total  
386 20- $\mu$ L CFE reactions, plus controls), which were individually packaged along with single-use,  
387 constant-volume pipettes, IPTG and water solution, and a desiccant card (**Figure 5A**). To test  
388 the long-term distributed stability of these reactions, we shipped the packages to two high  
389 schools in the Atlanta, Georgia metro area and presented the experiments to students along  
390 with accompanying curricula and pre- and post-lab surveys. At the time, students in both  
391 schools were in a hybrid setting, which meant that 32 students performed the experiments at  
392 home and 79 students completed them in a classroom. However, all students used plastic fixed-  
393 volume pipettes and incubated the reactions at room temperature. The success rate was  
394 measured qualitatively by photographs after 24 hours. These photographs, uncropped, are all  
395 available in **Supplemental File 5**.

396

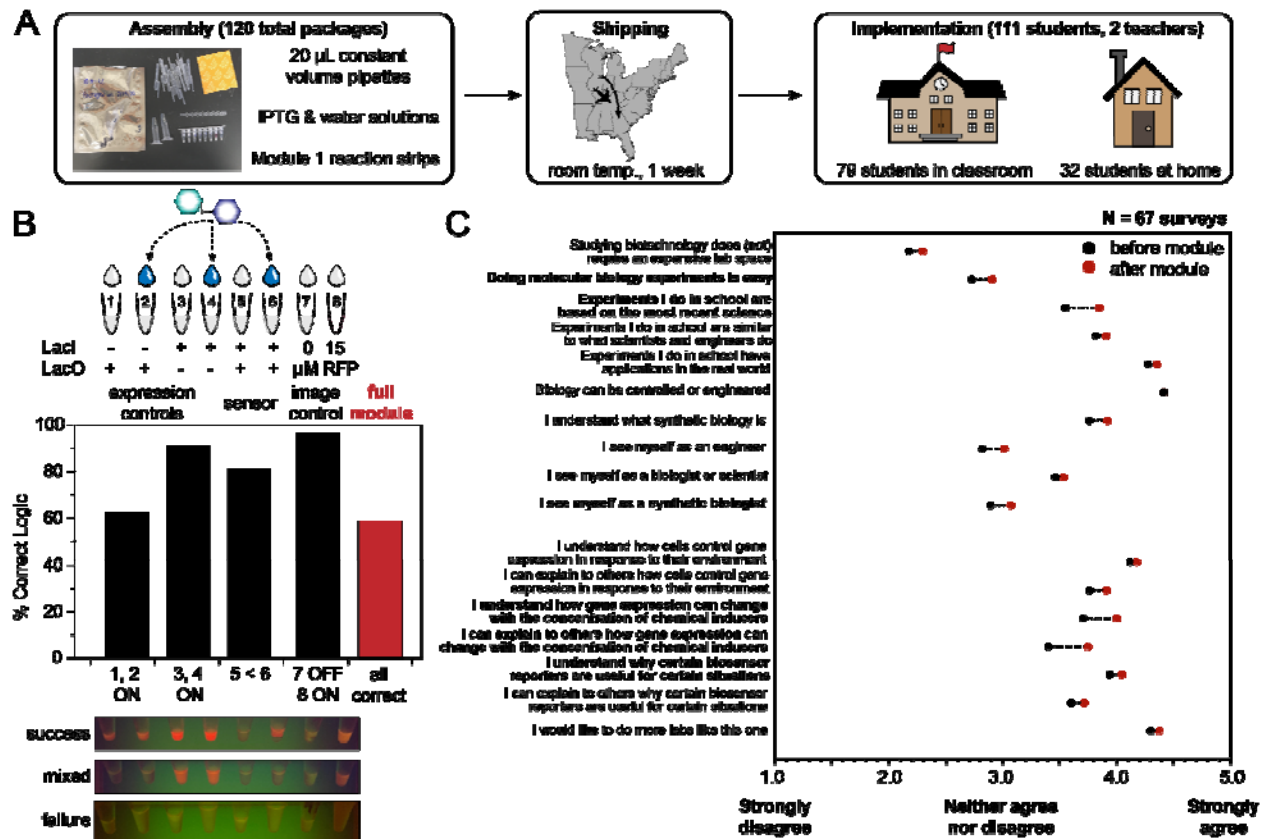

397

398 **Figure 5. Large-scale implementation of remote learning biosensing module.** (A) Overview  
 399 of broad-scale deployment of Module 1, including outside-of-the-classroom learning. 120  
 400 Module 1 packages containing fixed-volume pipettes, stocks of IPTG and water, and the freeze-  
 401 dried reaction eight-strips, were shipped from Northwestern University in desiccant packaging  
 402 (photo shown) to two high schools in Georgia. 111 students participated, including 79 who  
 403 performed the experiments in-person and 32 who ran the experiments at home. All students  
 404 used the constant-volume pipettes to simulate a low-resource setting. (B) Overview of Module 1  
 405 success. Photos were taken after 24 hours of reaction incubation at room temperature in blue  
 406 light (as available), and all tubes were scored as 0, 1, or 2 (“OFF”, “FAINT”, or “ON”) by two  
 407 researchers. The average of each tube assignment was used to indicate a success rate for the  
 408 whole module, with constitutive ON in tubes 1-4 and 8, OFF in tube 7, and a higher fluorescent  
 409 signal in tube 6 than in tube 5. Around 60% of the reported photos showed complete success –  
 410 that is, correct logic in every tube, though pipetting errors and lower-than-expected expression  
 411 from the pLac-mRFP plasmid reduced the success rate relative to the small-scale local  
 412 deployment in **Figure 2**. (C) Survey data overview, following the same analysis as in Figure 3,  
 413 from the 67 remote students who completed pre- and post-lab survey for the module. Bolded  
 414 statements indicate significant improvement ( $p < 0.05$ ) in score.

415  
 416 The results (**Figure 5B**) from the distributed, large-scale Module 1 were less consistent  
 417 than what we previously observed at the small scale (**Figure 2A**). Surprisingly low expression of  
 418 mRFP was observed from both pairs of conditions that used the pLac-mRFP plasmid. In many  
 419 cases (even in the absence of over-expressed LacI), tubes 1, 2, and 6 showed no visible

420 activation. Among the subset of tubes where mRFP production was visible at endpoint, nearly  
421 all students did obtain constitutive expression from tubes 3 and 4 (J23119-mRFP) and observed  
422 IPTG-mediated induction in tube 6, compared to tube 5.

423 Overall, by scoring each tube's brightness level as "OFF", "FAINT", or "ON", we  
424 assessed around a 60% global success rate for the module, which we considered acceptably  
425 comparable to standard biology and chemistry classroom labs. We could not easily ascertain  
426 the origin for the failure mode at scale. However, when the remaining reactions were rehydrated  
427 by experienced biology teachers using micropipettes, the constitutive reactions activated well,  
428 and the fixed-volume pipettes also worked, although they were less accurate (**Figure S5A**).  
429 There were also several examples of student tubes that were clearly over-diluted with water or  
430 IPTG relative to the nominal pre-lyophilized volume. These effects do inhibit protein synthesis  
431 (**Figure 5B, Figure S5B**).

432 Considering the scale and purpose of the experiment, we did not repeat it. We instead  
433 emphasize that further work should be done to investigate the reproducibility of cell-free  
434 reactions at scale. This could include optimization of large-scale extract preparation, reaction  
435 assembly, and lyophilization prior to shipment as well as analyzing the impact of environmental  
436 fluctuations (e.g., temperature, humidity, *etc.*) between lyophilization and rehydration. Despite  
437 the mixed results from the experiment, students reported significant improvements in both  
438 "perspective" and "comprehension" fields on the survey after completing the experiment (**Figure**  
439 **5C**). Importantly, students reported greater understanding of concentration-dependent behavior  
440 in biological systems as well as the benefits of different biological reporters.

441

442

## 443 **Conclusion**

444 The cell-free biosensor modules developed here represent easy-to-use, low-cost, and  
445 distributable biology education labs that achieve learning outcomes through a 1-week  
446 curriculum with minimal equipment. After our research team designed and validated  
447 experiments based on the canonical *lac* operon, ~20 high school students recapitulated  
448 laboratory data in their classrooms as they learned about the mechanisms, dose-responsive  
449 behavior, and common reporters for biosensors. Then, students undertook an engineering  
450 challenge to design, build, and test their own biosensor experiments using modular inputs  
451 (copper, fluoride, or lead ions) with modular outputs (fluorescent proteins, a fluorescent  
452 aptamer, or a colorimetric enzyme) for a more creative synthetic biology experience. Finally, we  
453 scaled up Module 1 (mechanism) for field testing with deployment to >100 students at schools  
454 700 miles away and achieved ~60% success across all modules using disposable pipettes in



455 classrooms and home settings during the SARS-CoV-2 pandemic. The effectiveness of these  
456 modules was assessed through surveys before and after each set of experiments, revealing  
457 significant increases in several perspective and comprehension questions. Students reported  
458 increased understanding of biological sensors and reporters and felt that classroom labs were  
459 based on modern science after completing the modules.

460 Teaching principles of genetic regulation, biological sensing mechanisms, and field  
461 applications of synthetic biology in a hands-on fashion has the potential for significant impact. In  
462 total, we reached over 130 students across 3 high schools in 2 states with experiments  
463 implemented in classrooms or at home, not in well-equipped laboratories. We anticipate that  
464 further expansion of cell-free education modules like the ones described here will facilitate  
465 advances in hands-on STEM education by improving access to stimulate greater and earlier  
466 interest in biotechnology careers.

## 467 **Supplemental Files**

### 468 *Supplemental Figures*

469 Supplemental Figure 1. LacI-enriched extract titration.

470 Supplemental Figure 2. Reporter plasmid titrations.

471 Supplemental Figure 3. True/false survey questions.

472 Supplemental Figure 4. All cascade data pairs.

473 Supplemental Figure 5. Troubleshooting large-scale Module 1 distribution.

### 474 *Supplemental Files*

475 Supplemental File 1. Uncropped raw photos and scores for Module 1 (Figure 2).

476 Supplemental File 2. Uncropped raw photos and scores for Module 2 (Figure 2).

477 Supplemental File 3. Uncropped raw photos and scores for Module 3 (Figure 2).

478 Supplemental File 4. Uncropped raw photos and scores for Module 1 (Figure 5).

479 Supplemental File 5. All lab reports for Module 4 (Figure 4).

480 Supplemental File 6. Lab curricula.

481

482

## 483 **Materials and Methods**

### 484 **DNA assembly and purification**

485 DNA was assembled using a mixture of commercial synthesis, PCR and blunt-end ligation, or  
486 isothermal (Gibson) assembly. pJBL7080 and pJBL7084 were synthesized by Twist  
487 Biosciences. pJBL7083 was synthesized by Gibson assembly using previously reported  
488 pJBL7010 and pJBL7072. pJBL7079 and pJBL7082 were synthesized by Gibson assembly  
489 using pJBL7080 and the constitutive expression cassettes as templates. pJBL7081 was  
490 assembled using overhang PCR and blunt-end ligation. The Module 4 plasmids were  
491 assembled using inverse PCR-blunt end ligation (all reporters: pJBL7056, pJBL7085,  
492 pJBL7086, pJBL7087) and Gibson assembly (all aTF expression cassettes and sensor  
493 plasmids, pJBL7093, pJBL7061, pJBL7062, pJBL7044, pJBL7045), with the exception of

494 pJBL7063, which we could not successfully clone and was synthesized by Twist Biosciences. A  
495 list of strains, including descriptions and Addgene accession IDs, are presented below in **Table**  
496 **2**. All annotated sequences are available on Addgene or by request.

497  
498 **Table 2. Summary of plasmids used in this manuscript.** pLac refers to the *lacUV5* promoter.  
499 pT7 refers to the wild-type T7 promoter TAATACGACTCACATATA, and pAKSIRV refers to the  
500 orthogonal promoter variant TAATAC**CTG**ACTATA, with the same 5' UTR. AKSIRV refers to  
501 that T7 RNAP variant from [71]. J23119 is a consensus *E. coli* RNAP promoter [72].

502

| Plasmid ID | Plasmid Description                       | Addgene ID |
|------------|-------------------------------------------|------------|
| pJBL7044   | pT7-PbrR                                  | 167215     |
| pJBL7045   | pT7-CueR                                  | 167216     |
| pJBL7056   | pAKSIRV-sfGFP                             | 167225     |
| pJBL7061   | pPbr-AKSIRV T7 RNAP                       | 167230     |
| pJBL7062   | pCue-AKSIRV T7 RNAP                       | 167231     |
| pJBL7063   | J23119-fluoride riboswitch-AKSIRV T7 RNAP | 167232     |
| pJBL7079   | pLac-sfGFP                                | 167244     |
| pJBL7080   | pLac-mRFP1                                | 167245     |
| pJBL7081   | pLac-Mango III                            | 167246     |
| pJBL7082   | pLac-XylE                                 | 167247     |
| pJBL7083   | J23119-mRFP1                              | N/A        |
| pJBL7084   | pT7-LacI                                  | 167248     |
| pJBL7085   | pAKSIRV-mRFP1                             | 167249     |
| pJBL7086   | pAKSIRV-Mango III                         | 167250     |
| pJBL7087   | pAKSIRV-XylE                              | 167251     |

503  
504 Plasmids were purified by Qiagen Midi Kits (ID 12143), quantified by NanoDrop, and stored  
505 long-term in water at -20 °C.

506  
507 **Cell extract preparation**

508 Cell extract was prepared to maximize expression from endogenous transcriptional machinery,  
509 as previously described [73] with a few modifications. For the laboratory-scale experiments in  
510 **Figures 1, 2, and 4**, unenriched cell-free extract, 20 mL of a saturated overnight culture of BL21  
511 Star (DE3) was inoculated into 1 L of 2X YT+P media (16 g/L tryptone, 10 g/L yeast extract, 5  
512 g/L sodium chloride, 7 g/L potassium phosphate dibasic, and 3 g/L potassium phosphate  
513 monobasic adjusted to pH 7.2) and grown, shaking at 220 rpm at 37 °C, to optical density 3.0

514 (this required approximately 3 hours and 15 minutes for the base strain). The culture was  
515 decanted into 1 L bottles and cells were pelleted by centrifugation at 5,000 X g for 15 minutes at  
516 4 °C. The cell pellets were washed once with 25 mL S30A buffer (14 mM Mg-glutamate, 60 mM  
517 K-glutamate, 50 mM Tris) and re-centrifuged for 10 minutes at 7,000 X g at 4 °C, following a  
518 report that one wash is sufficient to maintain good expression activity in the final extract [74].  
519 The pellets were resuspended in S30A buffer at a ratio of 1 mL buffer/g pellet, transferred to 1.7  
520 mL Eppendorf tubes, and sonicated on ice at 50% amplitude for 1 minute in six 10-second  
521 pulses using a QSonica Q125 small-tip probe. Immediately after sonication, 1 M dithiothreitol  
522 (DTT) was added to each tube to a final concentration of 3 mM. The lysate was clarified by  
523 centrifugation at 12,000 X g for 10 minutes at 4 °C. The top (supernatant) layer was removed,  
524 pipetted into a fresh tube, and incubated, shaking at 37 °C and 220 rpm, for 80 minutes for the  
525 ribosomal runoff reaction. After this time, the extract was centrifuged again at 12,000 X g for 10  
526 minutes at 4 °C. 3 mL supernatant was transferred to a 10 kDa molecular-weight cutoff  
527 membrane and dialyzed against 600 mL S30B buffer (14 mM Mg-glutamate, 60 mM K-  
528 glutamate, 5 mM Tris, 1 mM DTT, pH 7.7) for 3 hours without exchange. After dialysis, the  
529 extract was transferred back to 1.7 mL Eppendorf tubes, clarified by one additional spin at  
530 12,000 X g for 10 minutes at 4 °C, and the supernatant was removed, aliquoted, and flash  
531 frozen in liquid nitrogen.

532

533 For the enriched extracts (LacI, CueR, PbrR), a similar protocol was used. Chemically  
534 competent BL21 Star (DE3) cells were transformed with plasmids pJBL7084, pJBL7045, or  
535 pJBL7044 respectively, which encode the transcription factors under a T7 promoter. Overnight  
536 saturated cultures of these strains in LB were used to inoculate 1 L of 2X YT + P media and  
537 grown shaking, as before. Between optical density 0.4-0.5, 0.5 mM IPTG was added to induce  
538 protein synthesis. The strains were grown for 4-5 hours after induction and harvested as before.  
539 Extract was prepared identically, with the exception that no dialysis was performed on the  
540 enriched extracts. Instead, after the runoff reaction, the extracts were centrifuged, then directly  
541 aliquoted and flash frozen.

542

### 543 **Cell-free expression reaction**

544 Cell-free gene expression was carried out as previously described<sup>[73]</sup>, in a mixture composed of  
545 30 v/v% S12 extract; 8 mM magnesium glutamate, 10 mM ammonium glutamate, and 60 mM  
546 potassium glutamate; 1.2 mM ATP and 825 µM of CTP, GTP, and UTP; 34 mg/L folinic acid;  
547 171 mg/L tRNA; 2.5 mM each amino acid; 30 mM phosphoenolpyruvate (PEP); 330 µM

548 nicotinamide adenine dinucleotide (NAD); 270  $\mu$ M coenzyme A; 4 mM potassium oxalate; 1 mM  
549 putrescine; 1.5 mM spermidine; 57 mM HEPES; plasmid DNA prepared with Qiagen Midi Kits;  
550 and the remainder water. Module 3 assays were performed with the addition of 1 mM catechol  
551 or 10 nM T01:biotin. Plasmid was added at 40 nM concentration in Modules 1-3 and was  
552 supplied in a 10X stock at 50 nM in Module 4.

553

### 554 **Lyophilization and storage**

555 Prior to lyophilization, PCR strip tube flat caps (Axygen PCR-02-FCP-C) were punctured with a  
556 pin to create a hole, and PCR tube strips (Axygen PCR-02C) were placed into pre-chilled  
557 aluminum blocks on ice. Lyophilization was then performed by assembling the components of  
558 cell-free reactions as described above and placing them into pre-chilled PCR tube strips.  
559 Reaction tubes were then closed with the perforated PCR tube caps, submerged in liquid  
560 nitrogen, and transferred to a FreeZone 2.5 L Bench Top Freeze Dry System (Labconco). The  
561 reactions were then lyophilized for overnight with a condenser temperature of  $-85^{\circ}$  C and 0.04  
562 millibar pressure.

563

564 Unless rehydrated immediately, freeze-dried reactions were packaged as follows. About 2 - 5  
565 strips of reactions (16 - 40 tubes total) were placed in a light-protective bag (Mylar open-ended  
566 food bags, Uline #S-11661) with a desiccant (Dri-Card Desiccants, Uline #S-19582). The  
567 reactions were then heat-sealed (Metronic 8-inch Impulse Bag Sealer, Amazon #8541949845)  
568 and stored in a cool, shaded area until usage.

569

### 570 **mRFP1 purification**

571 mRFP1 purification was performed using a pET28c(+) expression plasmid pKJJ0062 (pT7-  
572 6XHis-TEV-mRFP). The sequence-verified plasmid was transformed into chemically competent  
573 Rosetta 2 (DE3) pLysS *E. coli*. A saturated overnight culture was inoculated into 1 L of LB  
574 media and grown at  $37^{\circ}$  C, then induced with 0.5 mM of IPTG at an optical density (600 nm) of  
575  $\sim$ 0.5 and grown for four additional hours at  $37^{\circ}$  C. Cultures were then pelleted by centrifugation  
576 at 5000 x g and were resuspended in lysis buffer (10 mM Tris-HCl pH 8, 500 mM NaCl, 1 mM  
577 TCEP, and protease inhibitor (cOmplete EDTA-free Protease Inhibitor Cocktail, Roche)).  
578 Resuspended cells were lysed on ice through ultrasonication, and insoluble material was  
579 removed by centrifugation. Clarified supernatant containing mRFP1 was then purified using His-  
580 tag affinity chromatography with a gravity column charged with Ni-NTA Agarose (Qiagen  
581 #30210). The elution from the gravity column was concentrated and buffer exchanged (25 mM

582 Tris-HCl, 100 mM NaCl, 1mM TCEP, 50% glycerol v/v) using centrifugal filtration (Amicon Ultra-  
583 0.5, Millipore Sigma). Protein concentrations were determined using the Qubit Protein Assay Kit  
584 (Invitrogen #Q33212). The purity and size of the proteins were validated on an SDS-PAGE gel  
585 (Mini-PROTEAN TGX and Mini-TETRA cell, Bio-Rad). Purified proteins were stored at 4° C.

586

### 587 **Visual analysis of student reactions**

588 Photographic student data was collected by imaging the reactions using a smartphone camera  
589 after approximately 24 hours incubation at room temperature. Photos were taken both in white  
590 light and in blue light using the miniPCR bio<sup>TM</sup> P51<sup>TM</sup> Molecular Fluorescence Viewer and were  
591 paired with (anonymized) tube identification numbers. We attempted but failed to quantitatively  
592 estimate RFP concentration relative to the 15 µM control tube from each photo, due to the poor  
593 image quality and unreliable lighting. Instead, we manually and qualitatively assigned each tube  
594 a value of “OFF”, “LOW”, and “ON”. Each tube in each photograph was ranked by at least two  
595 researchers to avoid bias. Examples of tubes ranked in each category are in **Figure 5**, and the  
596 full data set for each set of tubes is in the **Supplementary Files**. We then took the average of  
597 each qualitative measurement and used it to assign a success rate for the module.

598

### 599 **Survey analysis**

600 Pre- and post-survey responses were paired for individuals according to their sample ID  
601 numbers, keeping student responses anonymous. Raw data sets were scrubbed to include only  
602 include paired, complete surveys, resulting in smaller sample sizes than the number of students  
603 who participated in the activities. For the binary questions, the asymptotic McNemar test with no  
604 continuity correction was used to assess statistical significance. For the categorical questions,  
605 the non-parametric Wilcoxon signed-rank paired test was used. This research was reviewed by  
606 the Northwestern Institutional Review Board Office and was determined to not be human  
607 research.

608

### 609 **CONFLICT OF INTEREST**

610 A.D.S, K. J. J., M.C.J., and J.B.L have filed provisional patent applications in the field of cell-free  
611 biosensing. J.B.L. and M.C.J. are co-founders and have financial interest in Stemloop, Inc.  
612 These latter interests are reviewed and managed by Northwestern University in accordance with  
613 their conflict of interest policies.

614

### 615 **Data Availability**

616 Source data for all figures will be available in the Northwestern University Arch Institutional  
617 Repository or upon request.

618

## 619 **Acknowledgments**

620 The authors acknowledge helpful conversations with members of the Jewett and Lucks labs.  
621 The authors gratefully acknowledge students at Evanston Township High School (Evanston, IL),  
622 Lambert High School (Suwanee, GA) and Centennial HS (Roswell, GA) for contributing data for  
623 this manuscript. This work is supported by the Army Research Laboratory and the Army  
624 Research Office (W911NF-22-2-0246), Army Contracting Command (W52P1J-21-9-3023),  
625 DTRA (HDTRA1-21-1-0038) the Department of Energy (DE-SC0023278), and the National  
626 Science Foundation (DGE – 2021900, CBET - 1936789). K.J.J. was supported in part by  
627 Northwestern University's Graduate School Cluster in Biotechnology, System, and Synthetic  
628 Biology, which is affiliated with the Biotechnology Training Program (T32GM008449), by a Ryan  
629 Fellowship, and by a McCormick School of Engineering Terminal Year Fellowship. B.J.R. was  
630 supported by a National Defense Science and Engineering Graduate Fellowship (ND-CEN-017-  
631 095). G.A.R was supported by a National Science Graduate Research Fellowship (DGE-  
632 1842165). A.D.S. was supported in part by a Ryan Fellowship and a Presidential Fellowship.  
633 H.M.E. was supported in part by a National Defense Science and Engineering Graduate  
634 Fellowship (F-6669029987) and a Paul and Daisy Soros Fellowship. B.M.W. was supported by  
635 a National Science Graduate Research Fellowship (DGE-2234667).

636

## 637 **References**

638

- 639 1. Freeman, S., et al., *Active learning increases student performance in science,*  
640 *engineering, and mathematics.* Proceedings of the National Academy of Sciences, 2014.  
641 **111**(23): p. 8410-8415.
- 642 2. Christensen, R., G. Knezek, and T. Tyler-Wood, *Alignment of Hands-on STEM*  
643 *Engagement Activities with Positive STEM Dispositions in Secondary School Students.*  
644 *Journal of Science Education and Technology*, 2015. **24**(6): p. 898-909.
- 645 3. Hossain, Z., et al., *Interactive and scalable biology cloud experimentation for scientific*  
646 *inquiry and education.* *Nature Biotechnology*, 2016. **34**(12): p. 1293-1298.
- 647 4. Lemon, A., S.R. Bordenstein, and S.R. Bordenstein, *Discover the Microbes Within! The*  
648 *Wolbachia Project: Citizen Science and Student-Based Discoveries for 15 Years and*  
649 *Counting.* *Genetics*, 2020. **216**(2): p. 263-268.
- 650 5. Temple, L. and L. Lewis, *Phage on the stage.* *Bacteriophage*, 2015. **5**(3): p. e1062589.
- 651 6. Micklos, D. and L. Barone, *Asking the Wrong Questions About American Science*  
652 *Education: Insights from a Longitudinal Study of High School Biotechnology Lab*  
653 *Instruction.* bioRxiv, 2021: p. 2021.11.29.470152.

- 654 7. Mueller, A.L., N.A. Knobloch, and K.S. Orvis, *Exploring the effects of active learning on*  
655 *high school students' outcomes and teachers' perceptions of biotechnology and genetics*  
656 *instruction*. Journal of Agricultural Education, 2015. **56**(2): p. 138-152.
- 657 8. Khalil, A.S. and J.J. Collins, *Synthetic biology: applications come of age*. Nature  
658 Reviews Genetics, 2010. **11**(5): p. 367-379.
- 659 9. Perry, E., et al., *How to grow (almost) anything: a hybrid distance learning model for*  
660 *global laboratory-based synthetic biology education*. Nature Biotechnology, 2022.  
661 **40**(12): p. 1874-1879.
- 662 10. Gallup, O., H. Ming, and T. Ellis, *Ten future challenges for synthetic biology*. Engineering  
663 Biology, 2021. **5**(3): p. 51-59.
- 664 11. Clarke, L. and R. Kitney, *Developing synthetic biology for industrial biotechnology*  
665 *applications*. Biochemical Society transactions, 2020. **48**(1): p. 113-122.
- 666 12. Aurand, E., et al., *Engineering Biology: A Research Roadmap for the Next-Generation*  
667 *Bioeconomy*. 2019.
- 668 13. Baker, B., *Synthetic Biology and the Marketplace: Building the new bioeconomy*.  
669 BioScience, 2017. **67**(10): p. 877-883.
- 670 14. *Executive Order on Advancing Biotechnology and Biomanufacturing Innovation for a*  
671 *Sustainable, Safe, and Secure American Bioeconomy*. 2022.
- 672 15. Walker, J.T., *Middle School Student Knowledge of and Attitudes Toward Synthetic*  
673 *Biology*. Journal of Science Education and Technology, 2021. **30**(6): p. 791-802.
- 674 16. Vilanova, C. and M. Porcar, *iGEM 2.0—refoundations for engineering biology*. Nature  
675 Biotechnology, 2014. **32**(5): p. 420-424.
- 676 17. Kelwick, R., et al., *Promoting microbiology education through the iGEM synthetic biology*  
677 *competition*. FEMS Microbiology Letters, 2015. **362**(16).
- 678 18. Bernstein, R., K. Ingram, and K.M. Hart, *BioBuilder: Synthetic biology in the lab*. 2015: "  
679 O'Reilly Media, Inc."
- 680 19. Dymond, J.S., et al., *Teaching Synthetic Biology, Bioinformatics and Engineering to*  
681 *Undergraduates: The Interdisciplinary Build-a-Genome Course*. Genetics, 2009. **181**(1):  
682 p. 13-21.
- 683 20. Silverman, A.D., A.S. Karim, and M.C. Jewett, *Cell-free gene expression: an expanded*  
684 *repertoire of applications*. Nature Reviews Genetics, 2020. **21**(3): p. 151-170.
- 685 21. Garenne, D., et al., *Cell-free gene expression*. Nature Reviews Methods Primers, 2021.  
686 **1**(1): p. 49.
- 687 22. Carlson, E.D., et al., *Cell-free protein synthesis: applications come of age*. Biotechnol  
688 Adv, 2012. **30**(5): p. 1185-94.
- 689 23. Garenne, D., et al., *The all-E. coliTXTL toolbox 3.0: new capabilities of a cell-free*  
690 *synthetic biology platform*. Synthetic Biology, 2021. **6**(1).
- 691 24. Des Soye, B.J., et al., *A Highly Productive, One-Pot Cell-Free Protein Synthesis*  
692 *Platform Based on Genomically Recoded Escherichia coli*. Cell Chem Biol, 2019. **26**(12):  
693 p. 1743-1754.e9.
- 694 25. Stark, J.C., et al., *On-demand biomanufacturing of protective conjugate vaccines*.  
695 Science Advances, 2021. **7**(6): p. eabe9444.
- 696 26. Warfel, K.F., et al., *A Low-Cost, Thermostable, Cell-Free Protein Synthesis Platform for*  
697 *On-Demand Production of Conjugate Vaccines*. ACS Synthetic Biology, 2022.
- 698 27. Martin, R.W., et al., *Development of a CHO-Based Cell-Free Platform for Synthesis of*  
699 *Active Monoclonal Antibodies*. ACS Synth Biol, 2017. **6**(7): p. 1370-1379.
- 700 28. Yin, G., et al., *Aglycosylated antibodies and antibody fragments produced in a scalable*  
701 *in vitro transcription-translation system*. mAbs, 2012. **4**(2): p. 217-225.
- 702 29. Groff, D., et al., *Development of an E. coli strain for cell-free ADC manufacturing*.  
703 Biotechnol Bioeng, 2022. **119**(1): p. 162-175.

- 704 30. Stech, M., et al., *Cell-free synthesis of functional antibodies using a coupled in vitro*  
705 *transcription-translation system based on CHO cell lysates*. Scientific Reports, 2017.  
706 **7**(1): p. 12030.
- 707 31. Hunt, A.C., et al., *A high-throughput, automated, cell-free expression and screening*  
708 *platform for antibody discovery*. bioRxiv, 2021: p. 2021.11.04.467378.
- 709 32. Pardee, K., et al., *Portable, On-Demand Biomolecular Manufacturing*. Cell, 2016. **167**(1):  
710 p. 248-259.e12.
- 711 33. Pandi, A., et al., *Cell-free biosynthesis combined with deep learning accelerates de*  
712 *novo-development of antimicrobial peptides*. bioRxiv, 2022: p. 2022.11.19.517184.
- 713 34. Silverman, A.D., et al., *Design and Optimization of a Cell-Free Atrazine Biosensor*. ACS  
714 Synthetic Biology, 2020. **9**(3): p. 671-677.
- 715 35. Thavarajah, W., et al., *Point-of-Use Detection of Environmental Fluoride via a Cell-Free*  
716 *Riboswitch-Based Biosensor*. ACS Synth Biol, 2020. **9**(1): p. 10-18.
- 717 36. Jung, J.K., et al., *Cell-free biosensors for rapid detection of water contaminants*. Nature  
718 Biotechnology, 2020. **38**(12): p. 1451-1459.
- 719 37. Didovyk, A., et al., *Rapid and Scalable Preparation of Bacterial Lysates for Cell-Free*  
720 *Gene Expression*. ACS synthetic biology, 2017. **6**(12): p. 2198-2208.
- 721 38. Wang, X., et al., *Monitoring arsenic using genetically encoded biosensors in vitro: The*  
722 *role of evolved regulatory genes*. Ecotoxicology and Environmental Safety, 2021. **207**: p.  
723 111273.
- 724 39. Ma, D., et al., *Low-cost detection of norovirus using paper-based cell-free systems and*  
725 *synbody-based viral enrichment*. Synthetic Biology, 2018. **3**(1).
- 726 40. Sadat Mousavi, P., et al., *A multiplexed, electrochemical interface for gene-circuit-based*  
727 *sensors*. Nature Chemistry, 2020. **12**(1): p. 48-55.
- 728 41. Pardee, K., et al., *Paper-Based Synthetic Gene Networks*. Cell, 2014. **159**(4): p. 940-  
729 954.
- 730 42. Hong, F., et al., *Precise and Programmable Detection of Mutations Using Ultraspecific*  
731 *Riboregulators*. Cell, 2020. **180**(5): p. 1018-1032.e16.
- 732 43. Pardee, K., et al., *Rapid, Low-Cost Detection of Zika Virus Using Programmable*  
733 *Biomolecular Components*. Cell, 2016. **165**(5): p. 1255-1266.
- 734 44. Moore, S.J., et al., *Rapid acquisition and model-based analysis of cell-free transcription-*  
735 *translation reactions from nonmodel bacteria*. Proceedings of the National Academy of  
736 Sciences, 2018. **115**(19): p. E4340-E4349.
- 737 45. Karim, A.S., et al., *In vitro prototyping and rapid optimization of biosynthetic enzymes for*  
738 *cell design*. Nature Chemical Biology, 2020. **16**(8): p. 912-919.
- 739 46. Liew, F.E., et al., *Carbon-negative production of acetone and isopropanol by gas*  
740 *fermentation at industrial pilot scale*. Nature Biotechnology, 2022. **40**(3): p. 335-344.
- 741 47. Kightlinger, W., et al., *A cell-free biosynthesis platform for modular construction of*  
742 *protein glycosylation pathways*. Nature Communications, 2019. **10**(1): p. 5404.
- 743 48. Kightlinger, W., et al., *Design of glycosylation sites by rapid synthesis and analysis of*  
744 *glycosyltransferases*. Nat Chem Biol, 2018. **14**(6): p. 627-635.
- 745 49. Oza, J.P., et al., *Robust production of recombinant phosphoproteins using cell-free*  
746 *protein synthesis*. Nature Communications, 2015. **6**(1): p. 8168.
- 747 50. Huang, A., et al., *Implementing Hands-On Molecular and Synthetic Biology Education*  
748 *Using Cell-Free Technology*. Methods Mol Biol, 2022. **2433**: p. 413-432.
- 749 51. Stark, J.C., et al., *BioBits&#x2122; Bright: A fluorescent synthetic biology education kit*.  
750 Science Advances, 2018. **4**(8): p. eaat5107.
- 751 52. Huang, A., et al., *BioBits&#x2122; Explorer: A modular synthetic biology education kit*.  
752 Science Advances, 2018. **4**(8): p. eaat5105.
- 753 53. Williams, L.C., et al., *The Genetic Code Kit: An Open-Source Cell-Free Platform for*  
754 *Biochemical and Biotechnology Education*. Front Bioeng Biotechnol, 2020. **8**: p. 941.



- 755 54. Stark, J.C., et al., *BioBits Health: Classroom Activities Exploring Engineering, Biology,*  
756 *and Human Health with Fluorescent Readouts*. ACS Synthetic Biology, 2019. **8**(5): p.  
757 1001-1009.
- 758 55. Collias, D., et al., *An educational module to explore CRISPR technologies with a cell-*  
759 *free transcription-translation system*. Synthetic Biology, 2019. **4**(1).
- 760 56. Cumbers, J. *Cell-Free Technology Comes Of Age: BioBits Is Changing The Way We*  
761 *Teach Biology*. 2020; Available from:  
762 [https://www.forbes.com/sites/johncumbers/2020/11/05/cell-free-technology-comes-of-](https://www.forbes.com/sites/johncumbers/2020/11/05/cell-free-technology-comes-of-age-biobits-is-changing-the-way-we-teach-biology/?sh=3fdf3a282316)  
763 [age-biobits-is-changing-the-way-we-teach-biology/?sh=3fdf3a282316](https://www.forbes.com/sites/johncumbers/2020/11/05/cell-free-technology-comes-of-age-biobits-is-changing-the-way-we-teach-biology/?sh=3fdf3a282316).
- 764 57. Charczenko, R., et al., *LacOp: A free web-based lac operon simulation that enhances*  
765 *student learning of gene regulation concepts*. Biochem Mol Biol Educ, 2022. **50**(4): p.  
766 360-368.
- 767 58. Karig, D.K., et al., *Expression optimization and synthetic gene networks in cell-free*  
768 *systems*. Nucleic Acids Res, 2012. **40**(8): p. 3763-74.
- 769 59. Pardee, A.B., F. Jacob, and J. Monod, *The genetic control and cytoplasmic expression*  
770 *of "Inducibility" in the synthesis of  $\beta$ -galactosidase by E. coli*. Journal of Molecular  
771 Biology, 1959. **1**(2): p. 165-178.
- 772 60. Stamatakis, M. and N.V. Mantzaris, *Comparison of deterministic and stochastic models*  
773 *of the lac operon genetic network*. Biophys J, 2009. **96**(3): p. 887-906.
- 774 61. Pédelacq, J.-D., et al., *Engineering and characterization of a superfolder green*  
775 *fluorescent protein*. Nature Biotechnology, 2006. **24**(1): p. 79-88.
- 776 62. Autour, A., et al., *Fluorogenic RNA Mango aptamers for imaging small non-coding RNAs*  
777 *in mammalian cells*. Nature Communications, 2018. **9**(1): p. 656.
- 778 63. Dolgosheina, E.V., et al., *RNA Mango Aptamer-Fluorophore: A Bright, High-Affinity*  
779 *Complex for RNA Labeling and Tracking*. ACS Chemical Biology, 2014. **9**(10): p. 2412-  
780 2420.
- 781 64. Liu, X., et al., *Design of a Transcriptional Biosensor for the Portable, On-Demand*  
782 *Detection of Cyanuric Acid*. ACS Synthetic Biology, 2020. **9**(1): p. 84-94.
- 783 65. Banerjee, A., *Teaching Science Using Guided Inquiry as the Central Theme: A*  
784 *Professional Development Model for High School Science Teachers*. Science Educator,  
785 2010. **19**(2): p. 1-9.
- 786 66. Bell, T., et al., *Collaborative Inquiry Learning: Models, tools, and challenges*.  
787 International Journal of Science Education, 2010. **32**(3): p. 349-377.
- 788 67. Morales, L.G., et al., *Ten simple rules for building an enthusiastic iGEM team*. PLOS  
789 Computational Biology, 2022. **18**(3): p. e1009916.
- 790 68. Silverman, A.D., M.C. Jewett, and J.B. Lucks, *Ultrasensitive and multiplexed cell-free*  
791 *biosensors using cascaded amplification and positive feedback* 2021, Northwestern  
792 University: United States.
- 793 69. Stoyanov, J.V., J.L. Hobman, and N.L. Brown, *CueR (YbbI) of Escherichia coli is a MerR*  
794 *family regulator controlling expression of the copper exporter CopA*. Mol Microbiol, 2001.  
795 **39**(2): p. 502-11.
- 796 70. Nourmohammadi, E., et al., *Construction of a sensitive and specific lead biosensor using*  
797 *a genetically engineered bacterial system with a luciferase gene reporter controlled by*  
798 *pbr and cadA promoters*. Biomed Eng Online, 2020. **19**(1): p. 79.
- 799 71. Meyer, A.J., J.W. Ellefson, and A.D. Ellington, *Directed Evolution of a Panel of*  
800 *Orthogonal T7 RNA Polymerase Variants for in Vivo or in Vitro Synthetic Circuitry*. ACS  
801 Synthetic Biology, 2015. **4**(10): p. 1070-1076.
- 802 72. Kelly, J.R., et al., *Measuring the activity of BioBrick promoters using an in vivo reference*  
803 *standard*. Journal of Biological Engineering, 2009. **3**(1): p. 4.

- 804 73. Silverman, A.D., et al., *Deconstructing Cell-Free Extract Preparation for in Vitro*  
805 *Activation of Transcriptional Genetic Circuitry*. ACS Synthetic Biology, 2019. **8**(2): p.  
806 403-414.
- 807 74. Levine, M.Z., et al., *Escherichia coli-Based Cell-Free Protein Synthesis: Protocols for a*  
808 *robust, flexible, and accessible platform technology*. JoVE, 2019(144): p. e58882.  
809
